# Supplementary material for: Modulating Glycoside Hydrolase Activity between Hydrolysis and Transfer Reactions Using an Evolutionary Approach
Source: MDPI journal article supplement (doi:10.3390/molecules26216586), 2021-10-30
Supplement: s1 [file s1]

# Modulating Glycoside-Hydrolases Activity Between Hydrolysis and Transfer Reactions Using an Evolutionary Approach

Rodrigo Arreola-Barroso <sup>1</sup>, Alexey Llopiz <sup>1</sup>, Leticia Olvera <sup>1</sup> and Gloria Saab-Rincón <sup>1,\*</sup>

<sup>1</sup> Departamento de Ingeniería Celular y Biocatálisis, Instituto de Biotecnología, Universidad Nacional Autónoma de México, Apartado Postal 510-3, Cuernavaca, Morelos, 62271, México; rodrigo.arreola@ibt.unam.mx (R.A.); alexey.llopiz@ibt.unam.mx (A.L.); leticia.olvera@ibt.unam.mx (L.O.)

\* Correspondence: gloria.saab@ibt.unam.mx

**Table S1.** Dataset 1. Internal group: collection of PDB structures employed to determine the enrichment factors.

| PDB ID | Resolution (Å) | Reported activity  | Activity towards $\alpha$ -(1→4) bonds | CAZy subfamily | Organism                                                                         | Reference |
|--------|----------------|--------------------|----------------------------------------|----------------|----------------------------------------------------------------------------------|-----------|
| 1A47   | 2.56           | CGTase             | Transferase                            | GH13_2         | <i>Thermoanaerobacterium thermosulfurigenes</i> (Clostridium thermosulfurogenes) | [110]     |
| 1UKQ   | 2.00           | CGTase             | Transferase                            | GH13_2         | <i>Bacillus sp. 1011</i>                                                         | [111]     |
| 2CXG   | 2.50           | CGTase             | Transferase                            | GH13_2         | <i>Niallia circulans</i> 251                                                     | [112]     |
| 2VR5   | 2.80           | Debranching enzyme | Transferase                            | GH13_11        | <i>Saccharolobus solfataricus</i> P2                                             | [113]     |
| 1MXG   | 1.60           | $\alpha$ -Amylase  | Hydrolase                              | GH13_7         | <i>Pyrococcus woesei</i>                                                         | [114]     |
| 1HX0   | 1.38           | $\alpha$ -Amylase  | Hydrolase                              | GH13_24        | <i>Sus scrofa</i>                                                                | [115]     |
| 1RPK   | 2.00           | $\alpha$ -Amylase  | Hydrolase                              | GH13_6         | <i>Hordeum vulgare</i>                                                           | [116]     |
| 1UH3   | 2.60           | $\alpha$ -Amylase  | Hydrolase                              | GH13_21        | <i>Thermoactinomyces vulgaris</i> R-47                                           | [117]     |
| 1WPC   | 1.90           | $\alpha$ -Amylase  | Hydrolase                              | GH13_5         | <i>Bacillus sp. 707</i>                                                          | [118]     |
| 2CPU   | 2.00           | $\alpha$ -Amylase  | Hydrolase                              | GH13_24        | <i>Homo sapiens</i>                                                              | [119]     |
| 2WC7   | 2.37           | Debranching enzyme | Hydrolase                              | GH13_20        | <i>Nostoc punctiforme</i> PCC 73102                                              | [120]     |
| 3BC9   | 1.35           | $\alpha$ -Amylase  | Hydrolase                              | GH13_5         | <i>Halothermothrix orenii</i> H 168                                              | [121]     |
| 3K8M   | 2.50           | $\alpha$ -Amylase  | Hydrolase                              | GH13_36        | <i>Bacteroides thetaiotaomicron</i> VPI-5482                                     | [122]     |
| 7TAA   | 1.98           | $\alpha$ -Amylase  | Hydrolase                              | GH13_1         | <i>Aspergillus oryzae</i> DSM63303                                               | [123]     |

**Table S2.** Dataset 2. External group: set of 3D structures used to test the ability of the enrichment factor to classify functionally enzymes in the GH13 family.

| PDB ID | Resolution (Å) | Reported Activity                                      | Activity towards $\alpha$ -(1→4) bonds | CAZy subfamily | Organism                                                                                     | Reference |
|--------|----------------|--------------------------------------------------------|----------------------------------------|----------------|----------------------------------------------------------------------------------------------|-----------|
| 1CGT   | 2.00           | Glucanotransferase                                     | Transferase                            | GH13_2         | <i>Niallia circulans</i> 8                                                                   | [124]     |
| 4JCL   | 1.70           | Glucanotransferase                                     | Transferase                            | GH13_2         | <i>Paenibacillus macerans</i> IAM1243/IB7 / IFO 3490 (NRRL B-388) / JFB05-01 (CCTCC M203062) | [125]     |
| 1BLI   | 1.90           | $\alpha$ -Amylase                                      | Hydrolase                              | GH13_5         | <i>Bacillus licheniformis</i> 584 / ATCC 27811                                               | [126]     |
| 1GCY   | 1.60           | Maltotetra-saccharide (G4) producing $\alpha$ -amylase | Hydrolase                              | NA             | <i>Pseudomonas stutzeri</i> MO-19                                                            | [127]     |
| 1WZL   | 2.00           | Neopullunase<br>Cyclomaltodextrinase                   | Hydrolase                              | GH13_20        | <i>Thermoactinomyces vulgaris</i> R-47                                                       | [36]      |
| AmyA   | Q-mean 0.95    | $\alpha$ -Amylase                                      | Hydrolase                              | GH13_36        | <i>Thermotoga maritima</i> MSB8                                                              | [128]     |
| 3BC9   | 1.35           | $\alpha$ -Amylase                                      | Hydrolase                              | GH13_5         | <i>Halothermothrix orenii</i> H 168                                                          | [139]     |
| 3DHU   | 2.00           | $\alpha$ -Amylase                                      | Hydrolase                              | NA             | <i>Lactocaseibacillus plantarum</i> WCFS1                                                    | [130]     |
| 3EDF   | 1.65           | Cyclomaltodextrinase                                   | Hydrolase                              | NA             | <i>Flavobacterium</i> sp. 92                                                                 | [131]     |
| 3VM7   | 2.25           | $\alpha$ -Amylase                                      | Hydrolase                              | GH13_1         | <i>Malbranchea cinnamomea</i>                                                                | [132]     |
| 4AEE   | 2.28           | Maltogenic $\alpha$ -amylase<br>Cyclomaltodextrinase   | Hydrolase                              | GH13_20        | <i>Staphylothermus marinus</i> F1                                                            | [133]     |
| 4AEF   | 2.34           | $\alpha$ -Amylase<br>Cyclomaltodextrinase              | Hydrolase                              | GH13_20        | <i>Pyrococcus furiosus</i> DSM 3638                                                          | [134]     |
| 4GKL   | 2.40           | Maltogenic $\alpha$ -amylase                           | Hydrolase                              | NA             | <i>Thermotoga neapolitana</i> DSM 4359                                                       | [135]     |
| 4UZU   | 1.90           | $\alpha$ -Amylase                                      | Hydrolase                              | GH13_5         | <i>Geobacillus stearothermophilus</i> DY5 / PHI300 / NZ-3                                    | [136]     |

**Table S3.** Dataset 3. Enzymes to evaluate contact conservation and its correlation between enzymes.

| PDB ID | Resolution (Å) | CAZy family | CAZy Subfamily | Organism                                                                                      |
|--------|----------------|-------------|----------------|-----------------------------------------------------------------------------------------------|
| 3VM7   | 2.25           | GH13        | 1              | <i>Malbranchea cinnamomea</i>                                                                 |
| 7TAA   | 1.98           | GH13        | 1              | <i>Aspergillus oryzae</i> DSM63303                                                            |
| 1A47   | 2.56           | GH13        | 2              | <i>Thermoanaerobacterium thermosulfurigenes</i> EM1                                           |
| 1CGT   | 2.00           | GH13        | 2              | <i>Niallia circulans</i> 8                                                                    |
| 1QHO   | 1.70           | GH13        | 2              | <i>Geobacillus stearothermophilus</i> C599                                                    |
| 2CXG   | 2.50           | GH13        | 2              | <i>Niallia circulans</i> 251                                                                  |
| 1UKQ   | 2.00           | GH13        | 2              | <i>Bacillus</i> sp. 1011                                                                      |
| 4JCL   | 1.70           | GH13        | 2              | <i>Paenibacillus macerans</i> IAM1243/ IB7 / IFO 3490 (NRRL B-388) / JFB05-01 (CCTCC M203062) |
| 3ZSS   | 1.80           | GH13        | 3              | <i>Streptomyces coelicolor</i> A3(2)                                                          |
| 1WPC   | 1.90           | GH13        | 5              | <i>Bacillus</i> sp. 707                                                                       |
| 1BLI   | 1.90           | GH13        | 5              | <i>Bacillus licheniformis</i> 584 / ATCC 27811                                                |
| 3BC9   | 1.35           | GH13        | 5              | <i>Halothermothrix orenii</i> H 168                                                           |
| 4UZU   | 1.90           | GH13        | 5              | <i>Geobacillus stearothermophilus</i> DY5 / PHI300 / NZ-3                                     |
| 1RPK   | 2.00           | GH13        | 6              | <i>Hordeum vulgare</i>                                                                        |
| 1MXG   | 1.60           | GH13        | 7              | <i>Pyrococcus woesei</i>                                                                      |
| 3AMK   | 1.90           | GH13        | 8              | <i>Oryza sativa</i> Japonica Group                                                            |
| 3AML   | 1.70           | GH13        | 8              | <i>Oryza sativa</i> Japonica Group                                                            |
| 4BZY   | 2.75           | GH13        | 8              | <i>Homo sapiens</i>                                                                           |
| 2VR5   | 2.80           | GH13        | 11             | <i>Saccharolobus solfataricus</i> P2                                                          |
| 1WZL   | 2.00           | GH13        | 20             | <i>Thermoactinomyces vulgaris</i> R-47                                                        |
| 2YA0   | 1.85           | GH13        | 12             | <i>Streptococcus pneumoniae</i> TIGR4                                                         |
| 3FAW   | 2.10           | GH13        | 12             | <i>Streptococcus agalactiae</i> COH1                                                          |
| 2YOC   | 2.88           | GH13        | 13             | <i>Raoultella ornithinolytica</i> 10-5246                                                     |
| 2FHF   | 1.65           | GH13        | 13             | <i>Klebsiella pneumoniae</i> UNF5023                                                          |
| 2WC7   | 2.37           | GH13        | 20             | <i>Nostoc punctiforme</i> PCC 73102                                                           |
| 4AEE   | 2.28           | GH13        | 20             | <i>Staphylothermus marinus</i> F1                                                             |
| 4AEF   | 2.34           | GH13        | 20             | <i>Pyrococcus furiosus</i> DSM 3638                                                           |
| 1UH3   | 2.60           | GH13        | 21             | <i>Thermoactinomyces vulgaris</i> R-47                                                        |
| 1HX0   | 1.38           | GH13        | 24             | <i>Sus scrofa</i>                                                                             |
| 2CPU   | 2.00           | GH13        | 24             | <i>Homo sapiens</i>                                                                           |

|      |             |      |    |                                                   |
|------|-------------|------|----|---------------------------------------------------|
| 1UA7 | 2.21        | GH13 | 28 | <i>Bacillus subtilis</i> 2633                     |
| 1G9H | 1.80        | GH13 | 32 | <i>Pseudoalteromonas haloplanktis</i> TAB23 / A23 |
| 3K8M | 2.00        | GH13 | 36 | <i>Bacteroides thetaiotaomicron</i> VPI-5482      |
| AmyA | Q-mean 0.95 | GH13 | 36 | <i>Thermotoga maritima</i> MSB8                   |
| 1GCY | 1.60        | GH13 | NA | <i>Pseudomonas stutzeri</i> MO-19                 |
| 1LWJ | 2.50        | GH13 | NA | <i>Thermotoga maritima</i> MSB8                   |
| 3DHU | 2.00        | GH13 | NA | <i>Lactocaseibacillus plantarum</i> WCFS1         |
| 3EDF | 1.65        | GH13 | NA | <i>Flavobacterium</i> sp. 92                      |
| 4E2O | 2.10        | GH13 | NA | <i>Geobacillus thermoleovorans</i> CCB_US3_UF5    |
| 4GKL | 2.40        | GH13 | NA | <i>Thermotoga neapolitana</i> DSM 4359            |
| 2ZQ0 | 1.60        | GH97 | NA | <i>Bacteroides thetaiotaomicron</i> VPI-5482      |
| 3W37 | 1.70        | GH31 | NA | <i>Beta vulgaris</i>                              |

**Table S4.** Dataset 4: proteins reported as characterized by CAZy database [31]. For transferases all sequences were considered and modelled using the Swiss model if needed. For the hydrolase only sequences with reported structure were used. The ID for the structures is the PDB ID, while for models is the Uniprot or GenBank ID, followed by the PDB ID of the template used. For the models the Q-mean value is reported as resolution. All models were minimized using Rosetta.

| ID (PDB, Uniprot or GenBank)        | Resolution   | Reported Activity in CAZy database (species)                                                             | Activity towards $\alpha$ -(1 $\rightarrow$ 4) bonds reported in CAZy | CAZy subfamily          |
|-------------------------------------|--------------|----------------------------------------------------------------------------------------------------------|-----------------------------------------------------------------------|-------------------------|
| 1CDG                                | 2.00         | $\beta$ -Cyclodextrin glucanotransferase ( <i>Niallia circulans</i> 251)                                 | Transferase                                                           | <a href="#">GH13_2</a>  |
| 1CGT                                | 2.00         | $\beta$ -Cyclodextrin glucanotransferase ( <i>Niallia circulans</i> 8)                                   | Transferase                                                           | <a href="#">GH13_2</a>  |
| 1CYG                                | 2.50         | $\alpha/\beta$ -Cyclodextrin glucanotransferase ( <i>Geobacillus stearothermophilus</i> )                | Transferase                                                           | <a href="#">GH13_2</a>  |
| 1GJU                                | 2.40         | 4- $\alpha$ -Glucanotransferase/maltosyltransferase ( <i>Thermotoga maritima</i> )                       | Transferase                                                           | NA                      |
| 1LWJ                                | 2.50         | 4- $\alpha$ -Glucanotransferase ( <i>Thermotoga maritima</i> )                                           | Transferase                                                           | NA                      |
| 1V3M                                | 2.00         | Cyclodextrin glycosyltransferase ( <i>Bacillus</i> sp. 1011)                                             | Transferase                                                           | <a href="#">GH13_2</a>  |
| 2VR5                                | 2.80         | Isoamylase / 4- $\alpha$ -glucanotransferase ( <i>Saccharolobus solfataricus</i> P2)                     | Transferase                                                           | <a href="#">GH13_11</a> |
| 3BMV                                | 1.60         | $\alpha/\beta$ -Cyclodextrin glycosyl transferase ( <i>Thermoanaerobacterium thermosulfurigenes</i> EM1) | Transferase                                                           | <a href="#">GH13_2</a>  |
| 4JCL                                | 1.70         | $\alpha$ -Cyclodextrin glucanotransferase ( <i>Paenibacillus macerans</i> IAM1243)                       | Transferase                                                           | <a href="#">GH13_2</a>  |
| 4JCM                                | 1.65         | $\gamma$ -Cyclodextrin glucanotransferase ( <i>Evansella clarkii</i> )                                   | Transferase                                                           | <a href="#">GH13_2</a>  |
| A2QTS4_1cgt                         | QMEAN, -2.64 | Cell-wall 4- $\alpha$ -glucanotransferase ( <i>Aspergillus niger</i> CBS 513.88)                         | Transferase                                                           | <a href="#">GH13_1</a>  |
| A2QYT9_2aaa                         | QMEAN, -2.48 | 4- $\alpha$ -Glucanotransferase ( <i>Aspergillus niger</i> CBS 513.88)                                   | Transferase                                                           | <a href="#">GH13_1</a>  |
| P26827_1uks (1a47)                  | QMEAN, -1.85 | Cyclodextrin glucanotransferase ( <i>Thermoanaerobacterium thermosulfurigenes</i> )                      | Transferase                                                           | <a href="#">GH13_2</a>  |
| <a href="#">A0A077D499</a><br>3bmv  | QMEAN, -0.30 | Cyclodextrin glycosyl transferase (uncultured <i>Carboxydocella</i> )                                    | Transferase                                                           | <a href="#">GH13_2</a>  |
| <a href="#">A0A0C4WMI</a><br>5_1ciu | QMEAN, 0.72  | Cyclodextrin glycosyltransferase ( <i>Thermoanaerobacter</i> sp. P4)                                     | Transferase                                                           | <a href="#">GH13_2</a>  |
| B2D1U4_1ukt                         | QMEAN, 0.33  | Cyclodextrin glucanotransferase ( <i>Paenibacillus</i> sp. JB-13)                                        | Transferase                                                           | <a href="#">GH13_2</a>  |
| B2XY82_4jcl                         | QMEAN, -0.05 | Cyclodextrin glycosyl transferase ( <i>Paenibacillus graminis</i> MC22.13)                               | Transferase                                                           | <a href="#">GH13_2</a>  |
| C9WB02_1cgt                         | QMEAN, -0.01 | $\beta$ -Cyclodextrin glycosyl transferase ( <i>Paenibacillus illinoisensis</i> ZY-08 / ZY-8 )           | Transferase                                                           | <a href="#">GH13_2</a>  |
| <a href="#">B1VC16</a> _6cgt        | QMEAN, 0.07  | $\beta$ -cyclodextrin glycosyltransferase ( <i>Paenibacillus pabuli</i> US132)                           | Transferase                                                           | <a href="#">GH13_2</a>  |
| O82984_1ukq                         | QMEAN, -0.77 | $\beta$ -cyclodextrin glycosyltransferase ( <i>Bacillus</i> sp. A2-5A)                                   | Transferase                                                           | <a href="#">GH13_2</a>  |
| O86956_1lwh                         | QMEAN, -0.70 | 4- $\alpha$ -glucanotransferase ( <i>Thermotoga neapolitana</i> )                                        | Transferase                                                           | NA                      |
| O86959_1jfb                         | QMEAN, -2.52 | Cyclomaltodextrinase glucanotransferase ( <i>Thermotoga neapolitana</i> )                                | Transferase                                                           | <a href="#">GH13_20</a> |

|                 |              |                                                                                          |             |                         |
|-----------------|--------------|------------------------------------------------------------------------------------------|-------------|-------------------------|
| P08704_4jcm     | QMEAN, -3.00 | $\alpha$ -Cyclodextrin glucanotransferase<br>( <i>Klebsiella pneumoniae</i> M5a1)        | Transferase | <a href="#">GH13 2</a>  |
| P17692_1cdg     | QMEAN, 0.19  | $\beta$ -cyclomaltodextrin glucanotransferase<br>( <i>Bacillus</i> sp. B1018)            | Transferase | <a href="#">GH13 2</a>  |
| P31746_1pj9     | QMEAN, -0.59 | $\beta$ -Cyclodextrin glucanotransferase<br>( <i>Bacillus</i> sp. 1-1)                   | Transferase | <a href="#">GH13 2</a>  |
| P31747_6cgt     | QMEAN, 0.04  | Cyclodextrin glucanotransferase<br>( <i>Bacillus</i> sp. 6.3.3)                          | Transferase | <a href="#">GH13 2</a>  |
| P31835_6aij     | QMEAN, -0.30 | $\alpha$ -Cyclodextrin glucanotransferase<br>( <i>Paenibacillus macerans</i> )           | Transferase | <a href="#">GH13 2</a>  |
| Q3HUR2_6aij     | QMEAN, -3.55 | $\beta$ -cyclodextrin glucanotransferase<br>( <i>Pyrococcus furiosus</i> DSM 3638)       | Transferase | <a href="#">GH13 2</a>  |
| Q8X268_1uks     | QMEAN, -1.82 | $\beta$ -cyclodextrin glucanotransferase<br>( <i>Thermococcus kodakarensis</i> KOD1)     | Transferase | <a href="#">GH13 2</a>  |
| Q9UWN2_1q<br>ho | QMEAN, -1.51 | $\alpha$ -cyclodextrin glucanotransferase<br>( <i>Thermococcus</i> sp. B1001)            | Transferase | <a href="#">GH13 2</a>  |
| Q9ZAQ0_3b<br>mv | QMEAN, -0.63 | $\beta$ -cyclodextrin glucanotransferase<br>( <i>Geobacillus stearothermophilus</i> ET1) | Transferase | <a href="#">GH13 2</a>  |
| Q25CB6_4jcm     | QMEAN, -0.45 | g-cyclomaltodextrin glucanotransferase<br>( <i>Bacillus</i> sp. G-825-6)                 | Transferase | <a href="#">GH13 2</a>  |
| Q53I75_1ukq     | QMEAN, -0.07 | $\alpha$ -cyclomaltodextrin glucanotransferase<br>( <i>Haloferax mediterranei</i> )      | Transferase | <a href="#">GH13 2</a>  |
| 1AVA            | 1.9          | $\alpha$ -Amylase<br>( <i>Hordeum vulgare</i> )                                          | Hydrolase   | <a href="#">GH13 6</a>  |
| 1EA9            | 3.20         | Cyclomaltodextrinase<br>( <i>Bacillus</i> sp.)                                           | Hydrolase   | <a href="#">GH13 20</a> |
| 1G94            | 1.74         | $\alpha$ -Amylase<br>( <i>Pseudoalteromonas haloplanktis</i> )                           | Hydrolase   | <a href="#">GH13 32</a> |
| 1GCY            | 1.60         | Maltotetraose-forming amylase<br>( <i>Pseudomonas stutzeri</i> )                         | Hydrolase   | NA                      |
| 1HT6            | 1.50         | $\alpha$ -Amylase<br>( <i>Hordeum vulgare</i> )                                          | Hydrolase   | <a href="#">GH13 6</a>  |
| 1HX0            | 1.38         | $\alpha$ -Amylase<br>( <i>Sus scrofa</i> )                                               | Hydrolase   | <a href="#">GH13 24</a> |
| 1J0H            | 1.90         | Cyclomaltodextrinase / neopullulanase<br>( <i>Geobacillus stearothermophilus</i> TRS40)  | Hydrolase   | <a href="#">GH13 20</a> |
| 1JAE            | 1.65         | $\alpha$ -Amylase<br>( <i>Tenebrio molitor</i> )                                         | Hydrolase   | <a href="#">GH13 15</a> |
| 1JI1            | 1.60         | $\alpha$ -Amylase<br>( <i>Thermoactinomyces vulgaris</i> R-47)                           | Hydrolase   | <a href="#">GH13 21</a> |
| 1MWO            | 2.20         | $\alpha$ -Amylase<br>( <i>Pyrococcus woesei</i> )                                        | Hydrolase   | <a href="#">GH13 7</a>  |
| 1QHO            | 1.70         | Maltogenic $\alpha$ -amylase<br>( <i>Geobacillus stearothermophilus</i> C599)            | Hydrolase   | <a href="#">GH13 2</a>  |
| 1SMA            | 2.80         | Maltogenic $\alpha$ -amylase<br>( <i>Thermus</i> sp. IM6501)                             | Hydrolase   | <a href="#">GH13 20</a> |
| 1SMD            | 1.60         | $\alpha$ -Amylase<br>( <i>Homo sapiens</i> , salivary)                                   | Hydrolase   | <a href="#">GH13 24</a> |
| 1UA7            | 2.21         | $\alpha$ -Amylase<br>( <i>Bacillus subtilis</i> 2633)                                    | Hydrolase   | <a href="#">GH13 28</a> |
| 1UD2            | 2.13         | $\alpha$ -Amylase<br>( <i>Bacillus</i> sp. KSM-K38)                                      | Hydrolase   | <a href="#">GH13 5</a>  |

|      |      |                                                                                             |           |                         |
|------|------|---------------------------------------------------------------------------------------------|-----------|-------------------------|
| 1VJS | 1.70 | $\alpha$ -Amylase<br>( <i>Bacillus licheniformis</i> 584)                                   | Hydrolase | <a href="#">GH13_5</a>  |
| 1WPC | 1.90 | Maltohexaose-forming amylase<br>( <i>Bacillus sp.</i> 707)                                  | Hydrolase | <a href="#">GH13_5</a>  |
| 1WZA | 1.60 | $\alpha$ -Amylase<br>( <i>Halothermothrix orenii</i> H 168)                                 | Hydrolase | <a href="#">GH13_36</a> |
| 2D2O | 2.10 | Cyclomaltodextrinase / neopullulanase<br>( <i>Thermoactinomyces vulgaris</i> R-47)          | Hydrolase | <a href="#">GH13_20</a> |
| 2DIE | 2.10 | $\alpha$ -Amylase<br>( <i>Bacillus sp.</i> KSM-1378)                                        | Hydrolase | <a href="#">GH13_5</a>  |
| 2GJP | 1.90 | $\alpha$ -Amylase<br>( <i>Sutcliffiella halmapala</i> )                                     | Hydrolase | <a href="#">GH13_5</a>  |
| 2YA0 | 1.85 | Glycogen-degrading enzyme<br>( <i>Streptococcus pneumoniae</i> TIGR4)                       | Hydrolase | <a href="#">GH13_12</a> |
| 2ZE0 | 2.00 | $\alpha$ -Glucosidase<br>( <i>Geobacillus sp.</i> HTA-462)                                  | Hydrolase | <a href="#">GH13_31</a> |
| 3BC9 | 1.35 | $\alpha$ -Amylase<br>( <i>Halothermothrix orenii</i> H 168)                                 | Hydrolase | <a href="#">GH13_5</a>  |
| 3BH4 | 1.40 | $\alpha$ -Amylase<br>( <i>Bacillus amyloliquefaciens</i> )                                  | Hydrolase | <a href="#">GH13_5</a>  |
| 3DC0 | 2.78 | $\alpha$ -Amylase<br>( <i>Bacillus sp.</i> KR8104)                                          | Hydrolase | <a href="#">GH13_28</a> |
| 3EDJ | 1.69 | Cyclomaltodextrinase<br>( <i>Flavobacterium sp.</i> 92)                                     | Hydrolase | NA                      |
| 3VGF | 2.30 | $\alpha$ -Amylase / Maltooligosyltrehalose<br>( <i>Saccharolobus solfataricus</i> KM1)      | Hydrolase | <a href="#">GH13_10</a> |
| 3WN6 | 2.16 | $\alpha$ -Amylase<br>( <i>Oryza sativa</i> Japonica Group)                                  | Hydrolase | <a href="#">GH13_6</a>  |
| 3WY2 | 1.47 | $\alpha$ -Glucosidase<br>( <i>Halomonas sp.</i> H11)                                        | Hydrolase | <a href="#">GH13_23</a> |
| 4AEE | 2.28 | Maltogenic $\alpha$ -amylase/cyclomaltodextrinase<br>( <i>Staphylothermus marinus</i> F1)   | Hydrolase | <a href="#">GH13_20</a> |
| 4AEF | 2.34 | Maltogenic $\alpha$ -amylase/cyclomaltodextrinase<br>( <i>Pyrococcus furiosus</i> DSM 3638) | Hydrolase | <a href="#">GH13_20</a> |
| 4E2O | 2.10 | $\alpha$ -Amylase<br>( <i>Geobacillus thermoleovorans</i> CCB_US3_UF5)                      | Hydrolase | NA                      |
| 4GKL | 2.40 | Maltogenic $\alpha$ -amylase<br>( <i>Thermotoga neapolitana</i> DSM 4359)                   | Hydrolase | NA                      |
| 4UZU | 1.90 | $\alpha$ -Amylase<br>( <i>Geobacillus stearothermophilus</i> DY5)                           | Hydrolase | <a href="#">GH13_5</a>  |
| 5A2B | 1.85 | $\alpha$ -Amylase ( <i>Anoxybacillus sp.</i> SK3-4)                                         | Hydrolase | NA                      |
| 5H06 | 1.95 | $\alpha$ -Amylase (uncultured bacterium)                                                    | Hydrolase | <a href="#">GH13_37</a> |
| 6A0J | 1.60 | Cyclic maltosyl-maltose hydrolase<br>( <i>Arthrobacter globiformis</i> M6)                  | Hydrolase | <a href="#">GH13_20</a> |
| 6BS6 | 2.17 | $\alpha$ -Amylase / neopullulanase<br>( <i>Bacteroides thetaiotaomicron</i> VPI-5482)       | Hydrolase | <a href="#">GH13_36</a> |
| 7TAA | 1.98 | $\alpha$ -Amylase<br>( <i>Aspergillus oryzae</i> DSM63303)                                  | Hydrolase | <a href="#">GH13_1</a>  |

*Table S5.* Enrichment factors for contact 64–65 (D98-K99 in TmAmyA). They suggested the mutations D98P/K99A to make TmAmyA (a hydrolase) more like a transglycosidase. Residues that are not in the table have an enrichment factor of zero.

| Residue contact |      | Enrichment factor by residues |       |      |      |      |      |
|-----------------|------|-------------------------------|-------|------|------|------|------|
| 98              | P    | C                             | D     | A    | E    | T    | -    |
|                 | 0.45 | 0.25                          | 0.0   | -0.1 | -0.1 | -0.5 | -    |
| 99              | A    | Y                             | R     | N    | Q    | M    | K    |
|                 | 0.4  | 0.2                           | -0.05 | -0.1 | -0.1 | -0.1 | -0.3 |



**Table S6.** Enrichment values for the residues around residue 72 (F72 in TmGTase). While searching for a pair to mutate in TmGTase to augment its resemblance with a hydrolase we found this cluster of residues with high enrichment values, suggesting these residues are important for residue function. The pair of residues to mutate has an asterisk (\*).

| Residue Pair |      | Enrichment factor by residue pair |       |       |       |       |       |       |
|--------------|------|-----------------------------------|-------|-------|-------|-------|-------|-------|
| 72,88        | F, I | L, G                              | L, L  | L, V  | L, A  | F, L  | F, V  | -     |
|              | 0.8  | -0.09                             | -0.09 | -0.09 | -0.18 | -0.18 | -0.18 | -     |
| * 72,86      | F, V | L, I                              | L, A  | L, L  | F, I  | L, V  | -     | -     |
|              | 0.70 | 0.0                               | -0.09 | -0.18 | -0.27 | -0.27 | -     | -     |
| 72,76        | F, I | F, V                              | F, L  | L, S  | L, V  | L, I  | -     | -     |
|              | 0.6  | -0.07                             | -0.09 | -0.09 | -0.09 | -0.76 | -     | -     |
| 72,175       | F, W | F, F                              | L, F  | L, Y  | L, T  | L, V  | L, L  | -     |
|              | 0.50 | -0.09                             | -0.09 | -0.09 | -0.09 | -0.09 | -0.27 | -     |
| 72,73        | F, Q | F, K                              | F, D  | L, E  | L, V  | L, K  | L, Q  | F, R  |
|              | 0.4  | 0.30                              | -0.09 | -0.09 | -0.09 | -0.18 | -0.18 | -0.18 |
| 72,180       | F, I | F, V                              | L, L  | L, V  | F, L  | -     | -     | -     |
|              | 0.30 | 0.12                              | -0.09 | -0.09 | -0.27 | -     | -     | -     |

**Table S7.** Enrichment values for the residues around residue 273 (F273 in TmGTase). This trio of residues should be important to switch function as its residues have been selected both in hydrolases and transglycosidase. We mutated residues 274 and 279 (T274 and M279 in TmGTase), which are not in direct contact with the catalytic site.

| Residue Pair |      | Enrichment factor by residue pair |       |       |       |       |       |       |       |
|--------------|------|-----------------------------------|-------|-------|-------|-------|-------|-------|-------|
| 273,274      | F, I | Y, V                              | K, L  | F, L  | L, L  | F, V  | -     | -     | -     |
|              | 0.60 | 0.20                              | -0.09 | -0.09 | -0.09 | -0.63 | -     | -     | -     |
| 273,279      | F, M | Y, L                              | F, Y  | F, I  | K, E  | F, S  | L, T  | F, T  | F, N  |
|              | 0.60 | 0.20                              | -0.09 | -0.09 | -0.09 | -0.09 | -0.09 | -0.18 | -0.27 |

**Table S1.** Primers used to create the mutants used in this study.

| Enzyme mutated | Mutation  | Sequence (from 5' to 3')                         |
|----------------|-----------|--------------------------------------------------|
| <i>TmAmyA</i>  | K98P/D99A | ACAGACTACTACAACGTCGAGCCGGCGTACGGCACCATGGAAGATCTC |
| <i>TmGTase</i> | F72L      | CGATCATCTCTTTCAACTCTCTCTCACTACC                  |
| <i>TmGTase</i> | V86I      | GGAAGGTCAAGAACGATTTTATTCCGC                      |
| <i>TmGTase</i> | T274V     | CCCGGTGAATTTTGTTTCGAATCACG                       |
| <i>TmGTase</i> | M279N     | CGAATCACGACAACTCGAGGCTTGCAAGC                    |

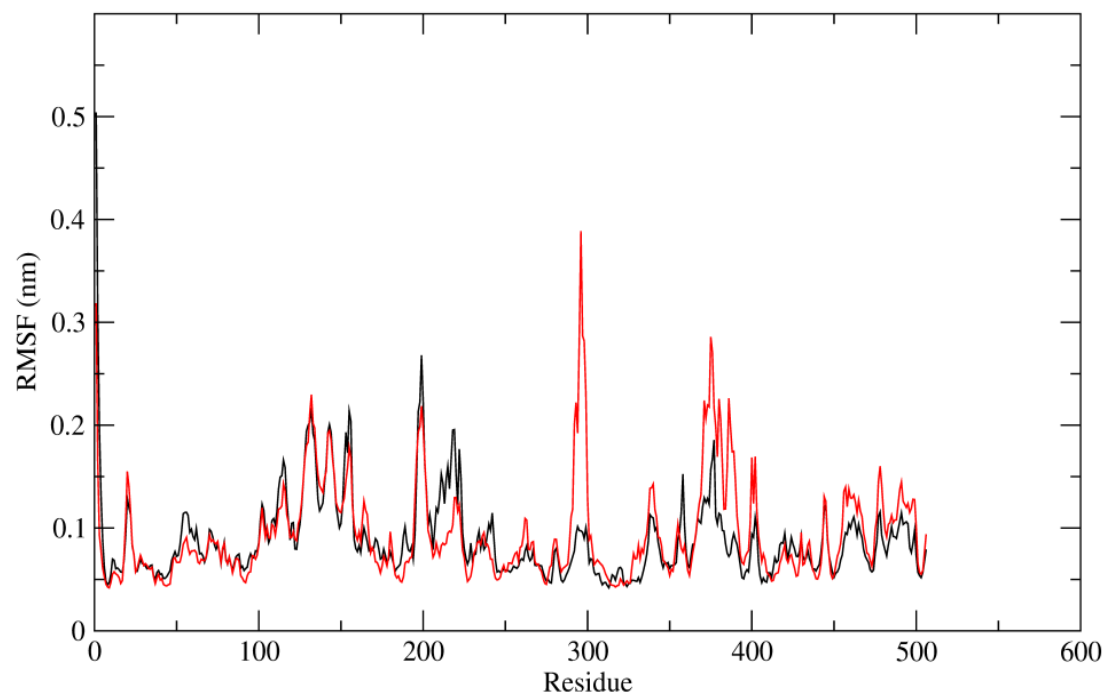

**Figure S1.** RMSF obtained from Molecular Dynamic (MD) simulation during 500 ns for TmAmyA wild type (red line) and K98P/D99A/H222Q mutant (black line). Here, the residue numbers are displaced by -29 relative to Liebl et al. [36].

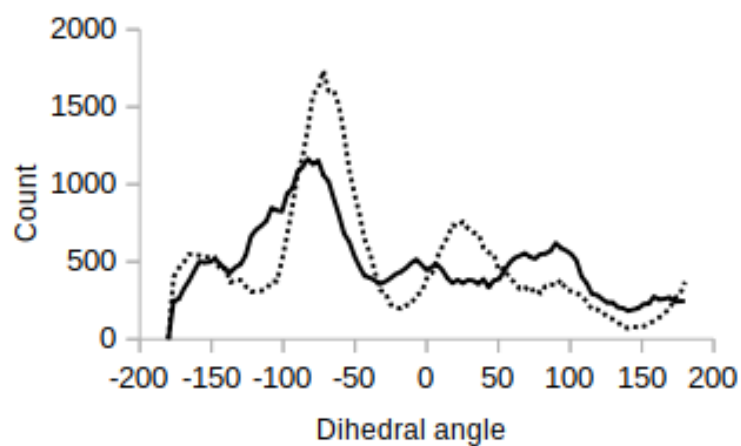

(a)

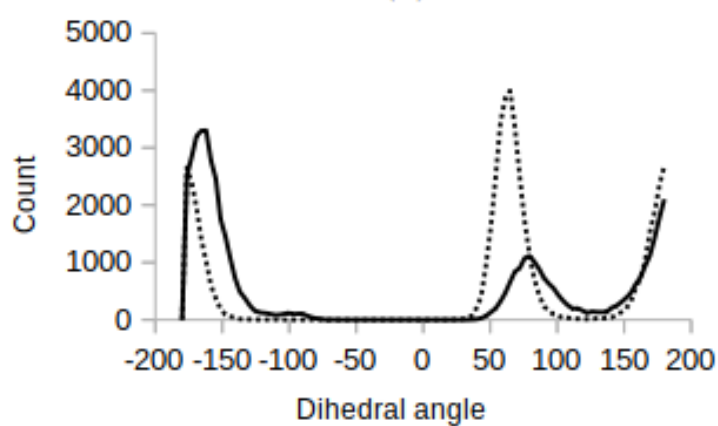

(b)

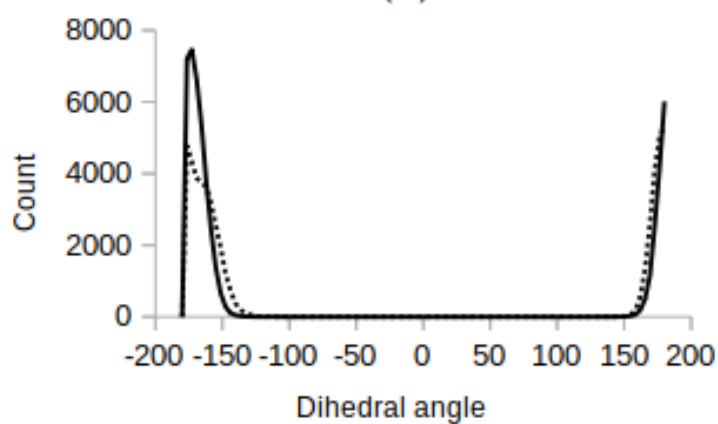

(c)

**Figure S2.** Conformational analysis of  $\chi$  dihedral angles of acid-base residue (Glu258) of TmAmyA for wild type (continue line) and K98P/D99A/H222Q (dotted lines). (a) dihedral angles  $\chi_3$  (b) dihedral angles  $\chi_2$  (c) dihedral angles  $\chi_1$ .

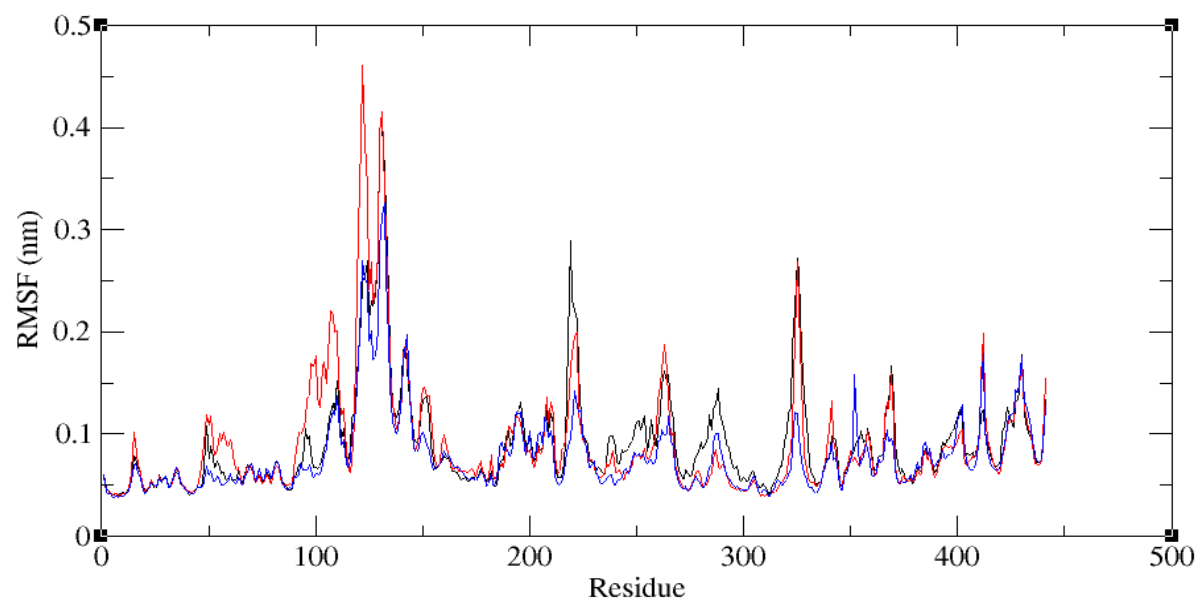

**Figure S3.** RMSF obtained from Molecular Dynamic (MD) simulation during 500 ns for TmGTase wild type (red line), M279N (black line) and T274V/M279N mutant (blue line).

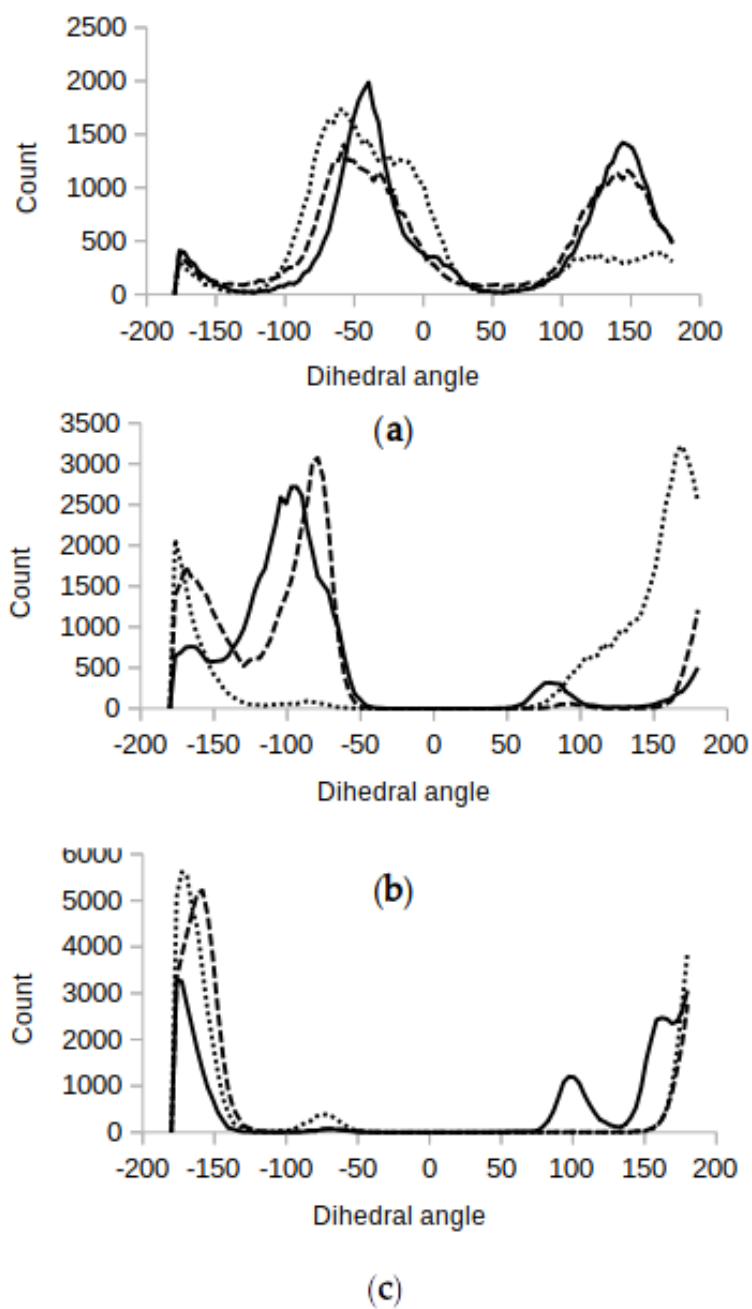

**Figure S4.** Conformational analysis of  $\chi$  dihedral angles of acid-base residue (Glu216) of TmGTase for wild type (continue line), M279N (dashed line), and T274V/M279N (dotted lines). (a) dihedral angles  $\chi_3$  (b) dihedral angles  $\chi_2$  (c) dihedral angles  $\chi_1$ .

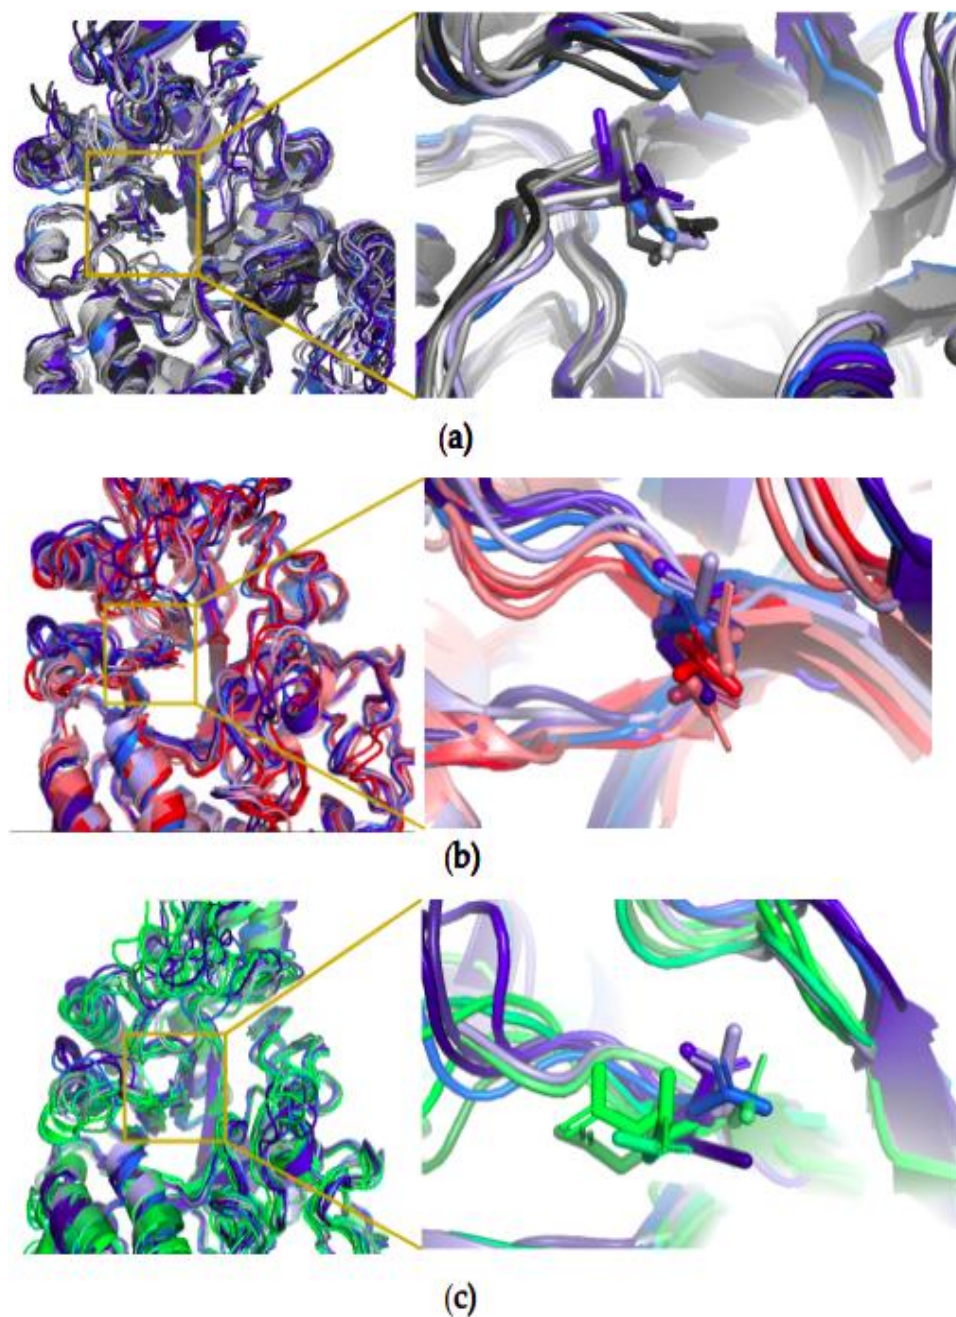

**Figure S5.** Representation of frames around 0.01, 100, 200, 300, and 400 ns for glycosidases. The increase in the intensity of color corresponds with the increment of frames number (a) Comparison of TmAmyA wild type (blue) with mutant D98P/K99A/H222Q (gray) (b) Comparison of TmGTase wild type (blue) with mutant T274V/M279N (red). (c) Comparison of TmGTase wild type (blue) with mutant M279N (green).

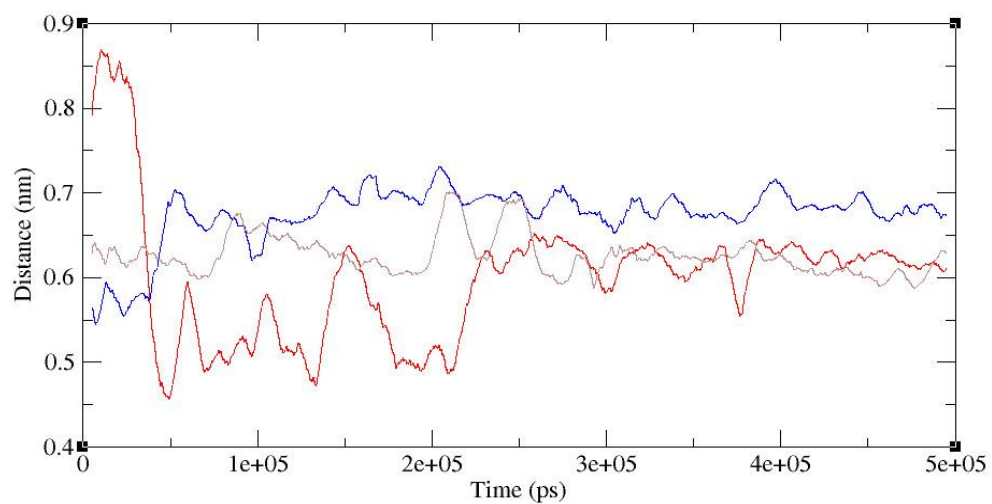

**Figure S6.** Change of average distance of D278 and E216 in TmGTase distance during MD simulation for wild type (blue line) M279N (red line) and T274V/M279N (gray line).

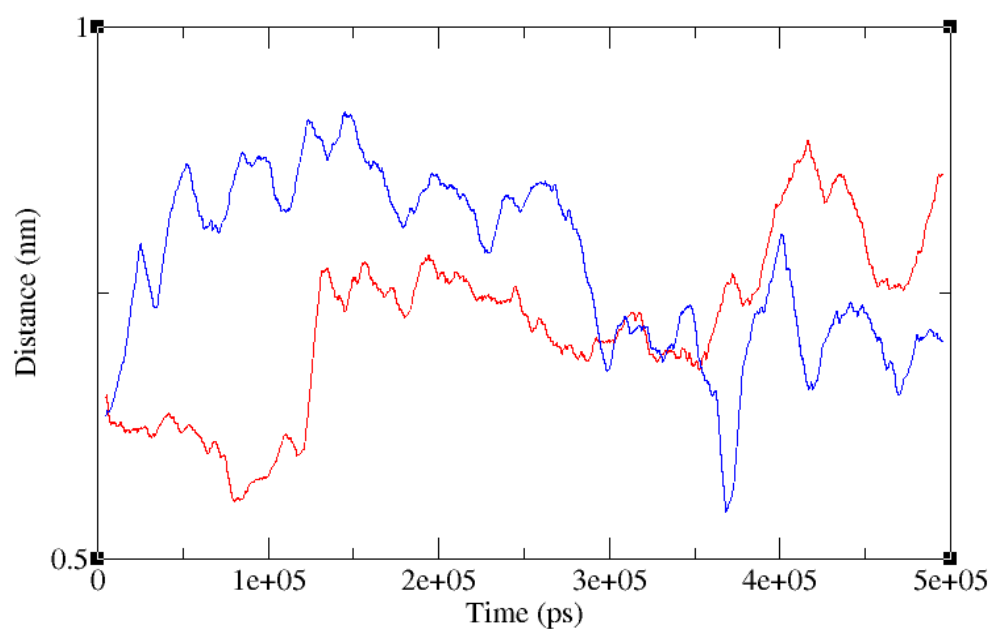

**Figure S1.** Change of average distance of D310 and E258 in TmAmyA distance during MD simulation for wild type (red line) and D98P/D99A/H222Q (red line).

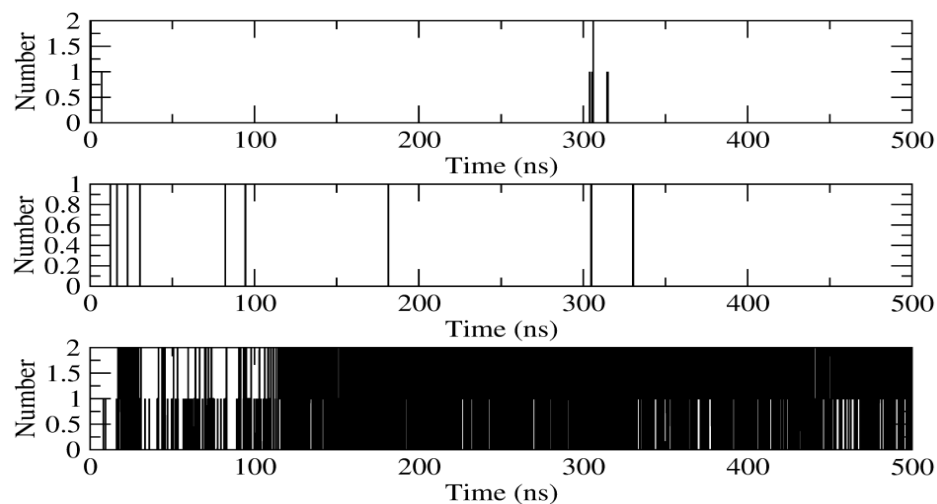

**Figure S8.** Number of hydrogen bonds during MD simulation of TmGTase for K324 and D278. (a) wild type. (b) M279N. (c) T274V/M279N.

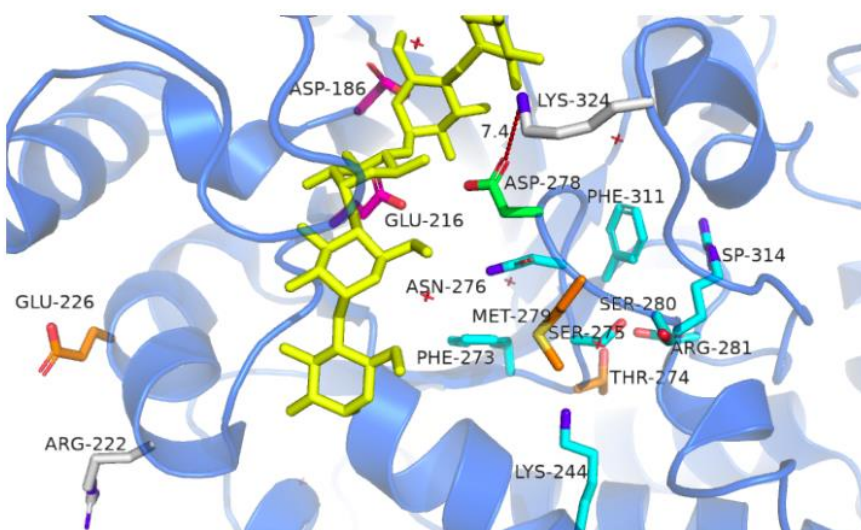

**Figure S9.** Structure TmGTase (PDB ID 1LWJ) highlighting the connection between the mutation sites and the catalytic residues (pink) including the binding subsites demarcated by acarbose (yellow). Residues T274 and M279 (orange sticks spheres) participate in a H-bond network (residues represented as cyan sticks). Dotted lines (red) indicate the distance between these residues. Only in T274V/M279N, D278 (green stick) and K324 (white stick) was detected a hydrogen bond during molecular dynamic analysis form a hydrogen bond. Residue E226 (orange sticks) is part of a helix (residues 221–231) connected to the loop that contains the catalytic acid-base residue E216 (pink stick).



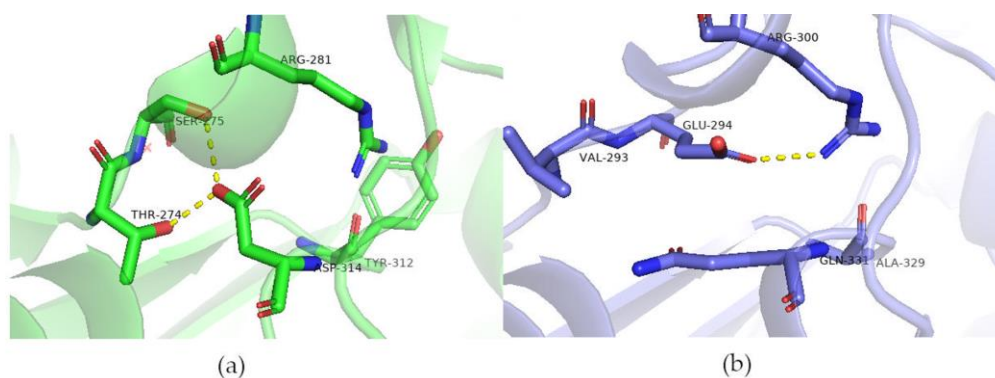

**Figure S10.** Contact network of residue T274. (a) TmGTase and (b) its equivalent in *Aspergillus oryzae*  $\alpha$ -amylase where T274 corresponds to V293 (PDB ID: 7taa).

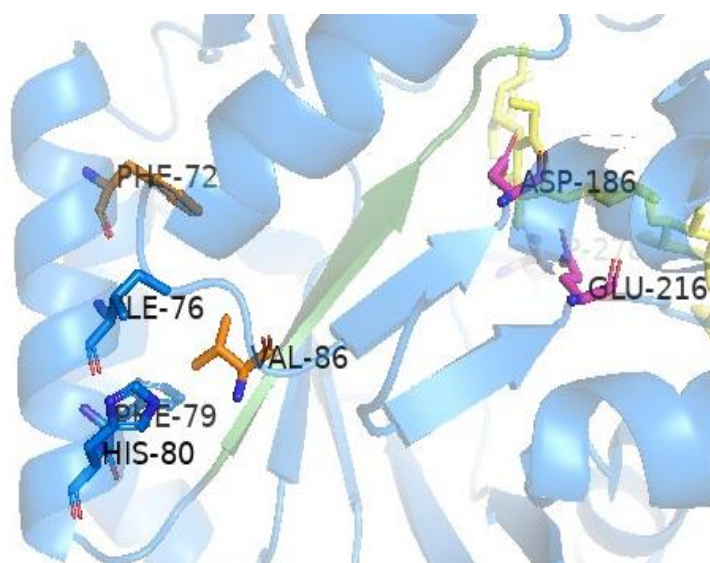

**Figure S11.** Residues F72 and V86 (orange sticks) affect the mobility and inclination of a  $\beta$ -strand (green cartoon) reaching the catalytic site of TmGTase. Positions 72 and 86 were additionally mutated in TmGTase. Modifying these residues far from the active site had a detrimental effect on activity, disfavoring the transglycosidic activity preferentially. These residues interact indirectly with the active center through a  $\beta$ -strand constituted by residues 85 to 90, which form a super-secondary structure with the  $\beta$ -strands from 182–185 and 211–215, being in the last the acid-base residue.

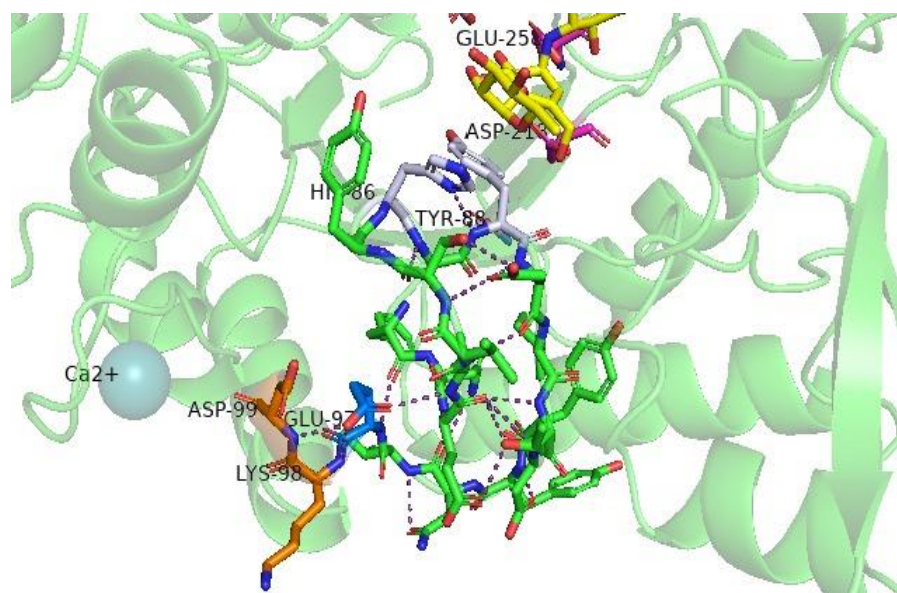

**Figure S12.** Residues K98 and D99 mediate the interaction of a calcium ion with the active site. A calcium ion (blueish green sphere) interacts with residues K98 and D99 (orange stick) in the TmAmyA 3D-structural model. Residues K98 and D99 connect the calcium ion to the +1 and +2 sites (H86, Y88) through a loop (green sticks). These sites are the acceptor binding positions during transglycosidation reaction. The inhibitor acarbose is shown in yellow sticks to show the binding subsites. The catalytic residues D218 and E258 (red and pink, respectively) delimit the enzyme's active center.

## References

110. Wind, R.D.; Liebl, W.; Buitelaar, R.M.; Penninga, D.; Spreinat, A.; Dijkhuizen, L.; Bahl, H. Cyclodextrin formation by the thermostable alpha-amylase of *Thermoanaerobacterium thermosulfurigenes* EM1 and reclassification of the enzyme as a cyclodextrin glycosyltransferase. *Appl. Environ. Microbiol.* **1995**, *61*, 1257–1265, doi:10.1128/aem.61.4.1257-1265.1995.
111. Nakamura, A.; Haga, K.; Yamane, K. Four aromatic residues in the active center of cyclodextrin glucanotransferase from alkalophilic *Bacillus* sp. 1011: effects of replacements on substrate binding and cyclization characteristics. *Biochemistry* **1994**, *33*, 9929–9936, doi:10.1021/bi00199a015.
112. van der Veen, B.A.; van Alebeek, G.J.; Uitdehaag, J.C.; Dijkstra, B.W.; Dijkhuizen, L. The three transglycosylation reactions catalyzed by cyclodextrin glycosyltransferase from *Bacillus circulans* (strain 251) proceed via different kinetic mechanisms. *Eur. J. Biochem.* **2000**, *267*, 658–665, doi:10.1046/j.1432-1327.2000.01031.x.
113. Park, H.-S.; Park, J.-T.; Kang, H.-K.; Cha, H.; Kim, D.-S.; Kim, J.-W.; Park, K.-H. TreX from *Sulfolobus solfataricus* ATCC 35092 displays isoamylase and 4-alpha-glucanotransferase activities. *Biosci. Biotechnol. Biochem.* **2007**, *71*, 1348–1352, doi:10.1271/bbb.70016.
114. Jørgensen, S.; Vorgias, C.E.; Antranikian, G. Cloning, Sequencing, Characterization, and Expression of an Extracellular  $\alpha$ -Amylase from the Hyperthermophilic Archaeon *Pyrococcus furiosus* in *Escherichia coli* and *Bacillus subtilis*. *J. Biol. Chem.* **1997**, *272*, 16335–16342, doi:10.1074/jbc.272.26.16335.
115. Robyt, J.F.; French, D. The action pattern of porcine pancreatic alpha-amylase in relationship to the substrate binding site of the enzyme. *J. Biol. Chem.* **1970**, *245*, 3917–3927.
116. Kramhøft, B.; Bak-Jensen, K.S.; Mori, H.; Juge, N.; Nøhr, J.; Svensson, B. Involvement of individual subsites and secondary substrate binding sites in multiple attack on amylose by barley alpha-amylase. *Biochemistry* **2005**, *44*, 1824–1832, doi:10.1021/bi048100v.
117. Tonozuka, T.; Ohtsuka, M.; Mogi, S.; Sakai, H.; Ohta, T.; Sakano, Y. A neopullulanase-type alpha-amylase gene from *Thermoactinomyces vulgaris* R-47. *Biosci. Biotechnol. Biochem.* **1993**, *57*, 395–401, doi:10.1271/bbb.57.395.
118. Kanai, R.; Haga, K.; Akiba, T.; Yamane, K.; Harata, K. Biochemical and crystallographic analyses of maltohexaose-producing amylase from alkalophilic *Bacillus* sp. 707. *Biochemistry* **2004**, *43*, 14047–14056, doi:10.1021/bi048489m.
119. Brayer, G.D.; Sidhu, G.; Maurus, R.; Rydberg, E.H.; Braun, C.; Wang, Y.; Nguyen, N.T.; Overall, C.M.; Withers, S.G. Subsite mapping of the human pancreatic alpha-amylase active site through structural, kinetic, and mutagenesis techniques. *Biochemistry* **2000**, *39*, 4778–4791, doi:10.1021/bi9921182.
120. Choi, J.-H.; Lee, H.; Kim, Y.-W.; Park, J.-T.; Woo, E.-J.; Kim, M.-J.; Lee, B.-H.; Park, K.-H. Characterization of a novel debranching enzyme from *Nostoc punctiforme* possessing a high specificity for long branched chains. *Biochem. Biophys. Res. Commun.* **2009**, *378*, 224–229, doi:10.1016/j.bbrc.2008.11.020.
121. Tan, T.-C.; Mijts, B.N.; Swaminathan, K.; Patel, B.K.C.; Divne, C. Crystal structure of the polyextremophilic alpha-amylase AmyB from *Halothermothrix orenii*: details of a productive enzyme-substrate complex and an N domain with a role in binding raw starch. *J. Mol. Biol.* **2008**, *378*, 852–870, doi:10.1016/j.jmb.2008.02.041.
122. Shipman, J.A.; Cho, K.H.; Siegel, H.A.; Salyers, A.A. Physiological characterization of SusG, an outer membrane protein essential for starch utilization by *Bacteroides thetaiotaomicron*. *J. Bacteriol.* **1999**, *181*, 7206–7211, doi:10.1128/JB.181.23.7206-7211.1999.
123. Nitta, Y.; Mizushima, M.; Hiromi, K.; Ono, S. Influence of molecular structures of substrates and analogues on Taka-amylase A catalyzed hydrolyses. I. Effect of chain length of linear substrates. *J. Biochem.* **1971**, *69*, 567–576.
124. Nitschke, L.; Heeger, K.; Bender, H.; Schulz, G.E. Molecular cloning, nucleotide sequence and expression in *Escherichia coli* of the beta-cyclodextrin glycosyltransferase gene from *Bacillus circulans* strain no. 8. *Appl. Microbiol. Biotechnol.* **1990**, *33*, 542–546, doi:10.1007/BF00172548.
125. Li, Z.; Li, B.; Gu, Z.; Du, G.; Wu, J.; Chen, J. Extracellular expression and biochemical characterization of alpha-cyclodextrin glycosyltransferase from *Paenibacillus macerans*. *Carbohydr. Res.* **2010**, *345*, 886–892, doi:10.1016/j.carres.2010.02.002.
126. Violet, M.; Meunier, J.C. Kinetic study of the irreversible thermal denaturation of *Bacillus licheniformis* alpha-amylase. *Biochem. J.* **1989**, *263*, 665–670, doi:10.1042/bj2630665.
127. Nakada, T.; Kubota, M.; Sakai, S.; Tsujisaka, Y. Purification and characterization of two forms of maltotetraose-forming amylase from *Pseudomonas stutzeri*. *Agric. Biol. Chem.* **1990**, *54*, 737–743.
128. Tonozuka, T.; Mogi, S.; Shimura, Y.; Ibuka, A.; Sakai, H.; Matsuzawa, H.; Sakano, Y.; Ohta, T. Comparison of primary structures and substrate specificities of two pullulan-hydrolyzing alpha-amylases, TVA I and TVA II, from *Thermoactinomyces vulgaris* R-47. *Biochim. Biophys. Acta* **1995**, *1252*, 35–42, doi:10.1016/0167-4838(95)00101-y.
129. Mijts, B.N.; Patel, B.K.C. Cloning, sequencing and expression of an alpha-amylase gene, amyA, from the thermophilic halophile *Halothermothrix orenii* and purification and biochemical characterization of the recombinant enzyme. *Microbiology* **2002**, *148*, 2343–2349, doi:10.1099/00221287-148-8-2343.

130. Plaza-Vinuesa, L.; Hernandez-Hernandez, O.; Moreno, F.J.; de Las Rivas, B.; Muñoz, R. Unravelling the diversity of glycoside hydrolase family 13  $\alpha$ -amylases from *Lactobacillus plantarum* WCFS1. *Microb. Cell Fact.* **2019**, *18*, 1–11, doi:10.1186/s12934-019-1237-3.
131. Buedenbender, S.; Schulz, G.E. Structural base for enzymatic cyclodextrin hydrolysis. *J. Mol. Biol.* **2009**, *385*, 606–617, doi:10.1016/j.jmb.2008.10.085.
132. Han, P.; Zhou, P.; Hu, S.; Yang, S.; Yan, Q.; Jiang, Z. A novel multifunctional  $\alpha$ -amylase from the thermophilic fungus *Malbranchea cinnamomea*: biochemical characterization and three-dimensional structure. *Appl. Biochem. Biotechnol.* **2013**, *170*, 420–435, doi:10.1007/s12010-013-0198-y.
133. Li, D.; Park, J.-T.; Li, X.; Kim, S.; Lee, S.; Shim, J.-H.; Park, S.-H.; Cha, J.; Lee, B.-H.; Kim, J.-W.; et al. Overexpression and characterization of an extremely thermostable maltogenic amylase, with an optimal temperature of 100 degrees C, from the hyperthermophilic archaeon *Staphylothermus marinus*. *N. Biotechnol.* **2010**, *27*, 300–307, doi:10.1016/j.nbt.2010.04.001.
134. Park, J.-T.; Song, H.-N.; Jung, T.-Y.; Lee, M.-H.; Park, S.-G.; Woo, E.-J.; Park, K.-H. A novel domain arrangement in a monomeric cyclodextrin-hydrolyzing enzyme from the hyperthermophile *Pyrococcus furiosus*. *Biochim. Biophys. Acta* **2013**, *1834*, 380–386, doi:10.1016/j.bbapap.2012.08.001.
135. Jun, S.-Y.; Kim, J.-S.; Choi, K.-H.; Cha, J.; Ha, N.-C. Structure of a novel  $\alpha$ -amylase AmyB from *Thermotoga neapolitana* that produces maltose from the nonreducing end of polysaccharides. *Acta Crystallogr. D. Biol. Crystallogr.* **2013**, *69*, 442–450, doi:10.1107/S0907444912049219.
136. Tomazic, S.J.; Klibanov, A.M. Mechanisms of irreversible thermal inactivation of *Bacillus* alpha-amylases. *J. Biol. Chem.* **1988**, *263*, 3086–3091.
